# Supplementary material
Source: PubMed Central journal article supplement (PMC10479791)
Supplement: NIHMS1922582-supplement-sb-2020-005666.pdf [file NIHMS1922582-supplement-sb-2020-005666.pdf]

## Supporting information

### **Toolkit for Quickly Generating and Characterizing Molecular Probes Specific for SARS-CoV-2**

#### **Nucleocapsid as a Primer for Future Coronavirus Pandemic Preparedness**

Laura Jo Sherwood <sup>1</sup> and Andrew Hayhurst <sup>1, †</sup>

<sup>1</sup> Disease Intervention and Prevention, Texas Biomedical Research Institute, San Antonio, TX 78227, USA

<sup>†</sup> Corresponding author: A. Hayhurst, Disease Intervention and Prevention, Texas Biomedical Research

Institute, 8715 West Military Drive, San Antonio, Texas, 78227-5302, USA. Tel: (210) 258-9530, Fax:

(210) 670-3329, Email: [ahayhurst@TxBiomed.org](mailto:ahayhurst@TxBiomed.org)

Nucleotide sequence of the pecan367 open reading frame encoding *pe/B* signal sequence, anti-SARS-CoV-2 nucleocapsid nanobody WuN3 (yellow highlight), D1D2 M13 linker, mNeonGreen and G<sub>4</sub>SH<sub>6</sub>.

*Nde* I, *Not* I, *Spe* I and *Hind* III restriction sites are underlined

catatgaaatacctattgcctacggcagccgctggattgttattactcgcggcccagccggccatggcgaaggtcaaactgcagcagtcagggggagg  
cttggtgcagactggggggtctctgagactctctgtgcacctctggacgcaccttcagtgatcaatgccatgggctggtagccaggctccaggaaa  
gcagcgcgagccggtcgcaacttattagtagtggtagcacaactatgcagactccgtgaagggccgcttcaccatctccagagacaatgtcaaga  
acacagtgatctgcaaatgaacaccctgaaacctgaggacacggcctctattactgctatacagaacgttggaaacctctggaatagagcgcga  
ctggggccaggggaccaggctaccgtctctcagaaccaagacacaaaaccacaaccagcggcctcgggggccaattcgcggccgaggcgcg  
gcggtctggtggtggtctggtggcggctctgagggtggtgctctgagggtggcggtctgagggtggcggtctgagggtggcggtctgagggtggcggtccgggtggtg  
gctctggtccggtactagtgtagcaagggcgaggagataacatggcctctctccagcgacacatgagttacacatcttggctccatcaacgggtg  
tggacttgacatggtgggtcagggcaccggcaatcacaatgatggttatgaggagttaaacctgaagtcaccaaggggtgacctccagttctcccct  
ggattctggtccctcatatcgggtatggtccatcagtagctgcctaccctgacgggatgtcgcctttccaggccgcatggtgatggtcctcgata  
ccaagtcacgcacaatgcagttgaaagtggcctcctactgtaactaccgctacacctacgaggaagccacatcaaaggagaggccagg  
tgaaggggactggtttccctgctgacggtctgtgatgaccaactcgtgaccgctcggactggtgcaggtcgaagaagacttaccacaacgacaaa  
accatcatcagtagctttaaagtgagttacaccactggaatggcaagcgtaccggagcactgcgagaccacctacacctttgccaagcaatggc  
ggtaactatctgaagaaccagccgatctggttccgtaagacggagctcaagcactcaagaccgagctcaacttcaaggagtggcaaaaggcc  
ttaccgatgtgatgggcatggacagctgtacaaggggtggcgtgctcgcacatcaccatcactaataagctt

Nucleotide sequence of the pecan373 mScarlet-I G<sub>4</sub>SH<sub>6</sub> region from *Spe* I to *Hind* III

actagtgtgagcaagggcgaggcagtgatcaaggagtcatgcggtcaaggtgcacatggagggtccatgaacggccacgagttcgatcgag  
ggcgagggcgagggcccccctacgagggcaccagaccgccaagctgaaggtgaccaaggggtggccccctgccttctctgggacatcctgtccc  
ctcagttcatgtacggctccagggcctcatcaagcaccgccgacatccccgactactataagcagtccttccccgagggctcaagtgaggagcgcg  
tgatgaaactcgaggacggcggcggctgacctgaccaggacacctcctggaggacggcaccctgatctacaaggtgaagctccgagccacaa  
cttccctctgacggccccgtaatgcagaagaagacaatgggctgggaagcgtccaccgagcgggtgtaccccaggagcggcgtgctgaagggcgac  
attaagatggcctgcgctgaaaggaggtggcggctacctggcgactcaagaccacctaagggccaagaagcccgtgcagatgccggcgct  
acaacgtcgaccgcaagttggacatcacctcccacaacgaggactacaccgtggtggaacagtagcaacgctccgagggccgactccaccggcg  
gcatggacgagctgtacaaggggtggcgggtgctcgcacatcaccatcactaataagctt

Nucleotide sequence of the pecan287 Gluc H<sub>6</sub> region from *Not* I to *Hind* III

gcgccgcagtcgacaaaccaactgaaacaatgaagattcaacatttagctgtagctagcaactttgctacaacggatctcgatgctgaccgtgg  
taaattgcccggaaaaaattaccacttgaggtagtcaaaagaatggaagccaatgctaggaaagctggctgactaggggatgtctgatgctgctg  
tcacacatcaagtcacacccaaaatgaagaagttatcccaggaagatgccacacctatgaaggagacaagaagtgacagggaggaatagg  
agaggctattgtgacattctgaaattcctgggttaaggattggaaccaatggaacaattcattgcacaagttgacctatgtgtagactgcacaact  
ggatgcctcaaaggtcttccaatgtgcaatgttctgattactcaagaatggctgccacaaagatgtgcaacttttctagcaaaattcaaggccaa  
gtggacaaaataaaggggtgcgggtggtgatcaccatcaccatcactaataagctt

Nucleotide sequence of the pecan278 APEX2 (Cys minus) G<sub>3</sub>H<sub>6</sub> region from *Not* I to *Hind* III

gcggccgcaggaaagtcttacccaactgtgagtctgattaccaggacgccgttgagaaggcgaagaagaagctcagaggcttcatcgctgagaag  
agatccgctcctctaatgctccgtttggcattccactctgctggaacctttgacaaggcacgaagaccggtggacccttcggaacctcaagcacctt  
gccgaactggctcacagcgtacaacggctctgacatcgctgttaggctttggagccactcaaggcggagttccctatcttgagctacgccgattct  
accagttggctggcgttgttgcgttgaggtcacgggtggacctaaaggtccattccacctggaagagaggacaagcctgagccaccagagggt  
cgcttgcctgatcccactaagggttctgaccattgagagatgtgttggcaaagctatggggcttactgaccaagatatcgttgctctatctgggggtc  
acactattggagctgcacacaaggagcgttctggattgagggtccctggacctctaatcctcttatttcgacaactcatacttcacggagttgtgagt  
ggtgagaaggaaggtctccttcagctaccttctgacaaggctctttgtctgacctgtattccgccctctcgttgacaaatgacagcggacgaagatg  
ccttcttctgattacgctgaggctcacaaaaactttccgagcttgggtttgctgatgccttgacagctgcctccctggagcgcctgacctggacggt  
ggcggatcaccatcaccatcactaataagctt
